# Supplementary material for: Does service timing matter for psychological outcomes in cardiac rehabilitation? Insights from the National Audit of Cardiac Rehabilitation
Source: PubMed Central journal article supplement (PMC5757407; doi:10.1177/2047487317740951), 2017-11-09

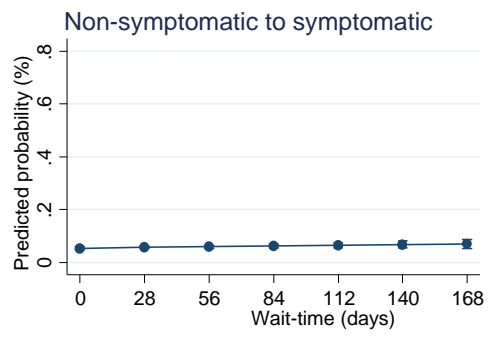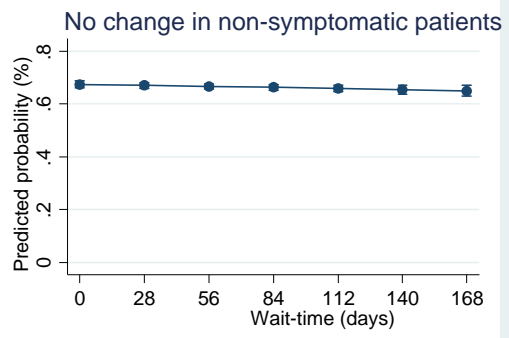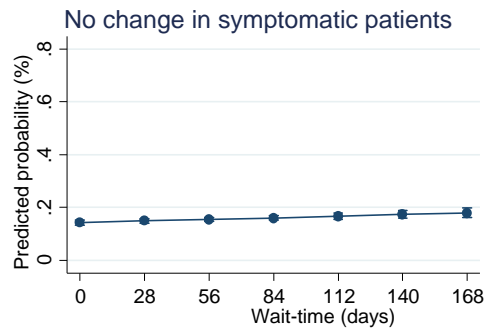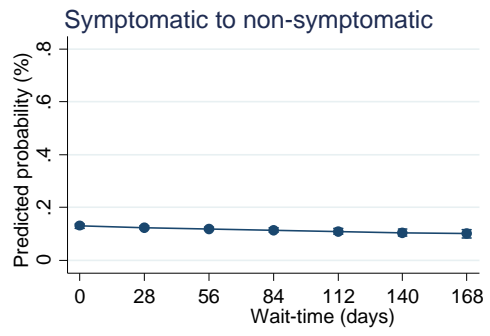

Supplement: Supplement_Anxiety.pdf [file Supplement_Anxiety.pdf]
